# Supplementary material
Source: PubMed Central journal article supplement (PMC9898162)
Supplement: NIHMS1853161-supplement-1.pdf [file NIHMS1853161-supplement-1.pdf]

**SUPPLEMENT TABLE 1: Antibody information**

| Target               | IHC            |           |          | Western Blot   |           |          |
|----------------------|----------------|-----------|----------|----------------|-----------|----------|
|                      | Company        | Cat #     | Dilution | Company        | Cat #     | Dilution |
| <b>RB1</b>           | Cell Signaling | 9309      | 1:1600   | Cell Signaling | 9309      | 1:1000   |
| <b>INSM1</b>         | Santa Cruz     | sc-271408 | 1:400    | Santa Cruz     | sc-271408 | 1:500    |
| <b>YAP1</b>          | Cell Signaling | 14074     | 1:400    | Cell Signaling | 4912      | 1:1000   |
| <b>ASCL1 (MASH1)</b> | BD Pharmingen  | 556604    | 1:100    | BD Pharmingen  | 556604    | 1:100    |
| <b>NEUROD1</b>       | Abcam          | 205300    | 1:500    | Cell Signaling | 4373      | 1:1000   |
| <b>POU2F3</b>        | Sigma          | HPA019652 | 1:800    | Sigma          | HPA019652 | 1:500    |
| <b>ACTB</b>          |                |           |          | Sigma          | A5441     | 1:10k    |
| <b>CCND1</b>         |                |           |          | Cell Signaling | 55506     | 1:1000   |
| <b>CDK2</b>          |                |           |          | Santa Cruz     | 6248      | 1:1000   |
| <b>CDK4</b>          |                |           |          | Cell Signaling | 12790     | 1:1000   |
| <b>CDK6</b>          |                |           |          | Cell Signaling | 3136      | 1:1000   |
| <b>E2F1</b>          |                |           |          | Santa Cruz     | 251       | 1:1000   |
| <b>CDKN2A</b>        |                |           |          | Cell Signaling | 4824      | 1:1000   |
| <b>pRB1-Ser780</b>   |                |           |          | Cell Signaling | 8180      | 1:1000   |

**SUPPLEMENT TABLE 2 : *RB1* LOF signature genes from Chen et al (reference 23)**

| Low expression in <i>RB1</i> -loss: <b>Enriched in wt <i>RB1</i></b> | High expression in <i>RB1</i> -loss: <b>Low in wt <i>RB1</i></b> |
|----------------------------------------------------------------------|------------------------------------------------------------------|
| ALDH18A1                                                             | ACYP1                                                            |
| APOBEC3C                                                             | AKAP5                                                            |
| ARAP3                                                                | BTF3L4                                                           |
| ARPC1B                                                               | CAMK2N2                                                          |
| ARPC2                                                                | CAND2                                                            |
| AUP1                                                                 | CCNE2                                                            |
| BAZ2A                                                                | CDKAL1                                                           |
| BECN1                                                                | CDKN2A                                                           |
| BMS1                                                                 | CDKN2C                                                           |
| CAB39L                                                               | CLSPN                                                            |
| CCND1                                                                | COCH                                                             |
| CDADC1                                                               | CPE                                                              |
| CDK6                                                                 | DAND5                                                            |
| CIB1                                                                 | DCHS1                                                            |
| COG3                                                                 | DEK                                                              |
| CTSB                                                                 | DONSON                                                           |
| DDX21                                                                | EID2B                                                            |
| DDX54                                                                | ELF2                                                             |
| DGKA                                                                 | FAM111B                                                          |
| DNAJA2                                                               | FANCL                                                            |
| DNPEP                                                                | FBLN7                                                            |
| DYRK4                                                                | GKAP1                                                            |
| E2F4                                                                 | GLRB                                                             |
| ECD                                                                  | GPR137C                                                          |
| EDEM1                                                                | H2AFV                                                            |
| EEF1D                                                                | HSD17B6                                                          |
| EIF3A                                                                | ID4                                                              |
| EIF3D                                                                | IQCC                                                             |
| ELF1                                                                 | JAKMIP1                                                          |
| EPB41L2                                                              | KCND2                                                            |
| ESD                                                                  | KCTD16                                                           |
| ETV4                                                                 | KIAA1841                                                         |
| FNDC3A                                                               | KLHL2                                                            |
| GHITM                                                                | LHX2                                                             |
| GLUD1                                                                | MESP1                                                            |
| GSTO1                                                                | MNS1                                                             |
| GTF2F2                                                               | NEURL1B                                                          |
| H6PD                                                                 | OSCP1                                                            |
| HIF1AN                                                               | PCSK1                                                            |
| HMGA2                                                                | PDIK1L                                                           |
| HMGXB3                                                               | PIK3R3                                                           |
| HOXB13                                                               | POU4F1                                                           |
| HPS6                                                                 | RAD1                                                             |
| IGF2BP2                                                              | RIBC2                                                            |

|         |          |
|---------|----------|
| IKBKE   | RNASEH2A |
| IMP4    | RTN3     |
| INTS6   | SH3GL2   |
| ITM2B   | SLC36A4  |
| KPNA3   | SPSB4    |
| LDB1    | STMN1    |
| LIF     | TCTEX1D2 |
| LRCH1   | TEX9     |
| M6PR    | TIGD7    |
| MCCC2   | TTLL7    |
| MED4    | TXNDC16  |
| MIPEP   | UBR7     |
| MMS19   | UCHL1    |
| MPG     | USP1     |
| MRPL35  | ZBTB8A   |
| MRPS31  | ZNF254   |
| MTHFD1L | ZNF347   |
| MTRF1   | ZNF367   |
| NAB2    | ZNF43    |
| NADSYN1 | ZNF528   |
| NEK3    | ZNF606   |
| NIP7    | ZNF610   |
| NOB1    | ZSCAN16  |
| NOP16   | ZSCAN18  |
| NPAS2   |          |
| NUDT15  |          |
| NUFIP1  |          |
| OAF     |          |
| OGFR    |          |
| PDCD6IP |          |
| PDE12   |          |
| PHF11   |          |
| PLD2    |          |
| POLD4   |          |
| POMP    |          |
| PUS1    |          |
| PVT1    |          |
| RB1     |          |
| RBM19   |          |
| RFT1    |          |
| RHBDF2  |          |
| RNF123  |          |
| RNF6    |          |
| RPL22L1 |          |
| SEC23IP |          |
| SEC24C  |          |

|           |  |
|-----------|--|
| SETDB2    |  |
| SFT2D1    |  |
| SLC12A9   |  |
| SLC25A15  |  |
| SLC25A30  |  |
| SMAD3     |  |
| SMO       |  |
| SMURF1    |  |
| SMYD5     |  |
| SNHG4     |  |
| SPRY4     |  |
| STAT6     |  |
| SUCLA2    |  |
| SUGT1     |  |
| TBC1D22A  |  |
| TCOF1     |  |
| THG1L     |  |
| TM9SF3    |  |
| TNFRSF10B |  |
| TOP1MT    |  |
| TPCN2     |  |
| TPT1      |  |
| TRADD     |  |
| WBP4      |  |
| WDFY2     |  |
| WDR59     |  |
| XPNPEP1   |  |
| XPO4      |  |

**SUPPLEMENT TABLE 3: H scores for all SCLC cases analyzed by IHC\***

|                 | PID | # cores | Site        | RB  | INSM1 | ASCL1 | NEUROD1 | POU2F3 | YAP1 |
|-----------------|-----|---------|-------------|-----|-------|-------|---------|--------|------|
| <b>TMA 0035</b> | 326 | 2       | node        | 120 | 50    | 50    | na      | na     | 120  |
|                 | 553 | 4       | brain       | 0   | 190   | 60    | 35      | 0      | 60   |
|                 | 551 | 2       | node        | 5   | 180   | 40    | na      | na     | 0    |
|                 | 425 | 2       | node        | 0   | 190   | 0     | na      | na     | 0    |
|                 | 424 | 2       | node        | 0   | 190   | 170   | 20      | na     | 10   |
|                 | 550 | 2       | node        | 10  | 190   | 160   | 0       | 0      | 5    |
|                 | 549 | 2       | lung        | 180 | 190   | 180   | 0       | 0      | 0    |
|                 | 548 | 2       | brain       | 0   | 190   | 160   | na      | na     | 0    |
|                 | 543 | 2       | lung        | 0   | 180   | 170   | 0       | 0      | 0    |
|                 | 541 | 2       | lung        | 140 | 10    | 0     | 10      | ?      | 160  |
|                 | 458 | 2       | lung        | 0   | 120   | 0     | na      | na     | 5    |
|                 | 519 | 2       | lung        | 5   | 180   | 190   | 0       | 0      | 0    |
|                 | 556 | 2       | lung        | 0   | 160   | 140   | 15      | 0      | 0    |
|                 | 482 | 2       | lung        | 5   | 190   | 190   | 0       | 0      | 10   |
|                 | 557 | 2       | pleura      | 0   | 190   | 20    | na      | na     | 0    |
|                 | 558 | 2       | spine       | 0   | 20    | 5     | 0       | 0      | 0    |
|                 | 559 | 2       | pleura      | 120 | 190   | 190   | na      | na     | 0    |
|                 | 475 | 2       | brain       | 0   | 90    | 0     | na      | 0      | 0    |
|                 | 555 | 4       | brain       | 0   | 190   | 180   | 20      | 0      | 0    |
| <b>TMA 0047</b> | 48  | 1       | lung        | 0   | 0     | na    | na      | na     | na   |
|                 | 277 | 2       | trachea     | na  | na    | na    | na      | na     | na   |
|                 | 217 | 2       | node        | 0   | 3     | 0     | 0       | na     | 0    |
|                 | ?   | 2       | node        | 0   | 270   | 270   | 60      | 30     | 3    |
|                 | 420 | 2       | node        | 0   | 0     | 15    | 150     | 0      | 90   |
|                 | 246 | 4       | mediastinum | 180 | 0     | 90    | 240     | 0      | 0    |
|                 | 200 | 2       | lung        | 0   | 10    | na    | na      | na     | na   |
|                 | 243 | 2       | lung        | 90  | 240   | 0     | 0       | 0      | 0    |
|                 | 268 | 2       | lung        | 0   | 150   | na    | na      | na     | na   |
|                 | 270 | 2       | neck        | 0   | 240   | 225   | 0       | 0      | 0    |
|                 | 302 | 2       | lung        | 0   | 120   | na    | na      | na     | na   |
|                 | 408 | 2       | bronchus    | 0   | 40    | na    | na      | 0      | 0    |
|                 | 343 | 2       | node        | 0   | 5     | na    | na      | na     | na   |
|                 | 374 | 2       | bronchus    | 0   | 5     | na    | na      | na     | na   |
|                 | 394 | 2       | lung        | 0   | 60    | 0     | 0       | 0      | 0    |
|                 | 283 | 2       | node        | 0   | 0     | 0     | na      | 0      | 0    |
|                 | 340 | 4       | node        | 0   | 60    | 0     | 10      | 0      | 0    |
|                 | 508 | 2       | diaphragm   | 3   | 240   | na    | na      | na     | na   |
|                 | 598 | 2       | adrenal     | 0   | 240   | 270   | 15      | 3      | 60   |
|                 | 636 | 2       | pleura      | 100 | 270   | 160   | 255     | 0      | 0    |
|                 | 639 | 4       | node        | 0   | 285   | na    | na      | na     | na   |

|                                 | Cases |                 |      |
|---------------------------------|-------|-----------------|------|
| Positives (H Score at least 20) | #     | total evaluable | %    |
| RB1                             | 9     | 62              | 14.5 |
| INSM1                           | 51    | 62              | 82.2 |
| ASCL1                           | 36    | 51              | 70.5 |
| NEUROD1                         | 16    | 41              | 39   |
| POU2F3                          | 1     | 42              | 2.3  |
| YAP1                            | 7     | 53              | 20.7 |
|                                 |       |                 |      |
| RB1/YAP1                        | 3     | 9               | 33.3 |
| RB1/INSM1                       | 7     | 9               | 77.7 |
| RB1/ASCL1                       | 7     | 9               | 77.7 |
| RB1/NEUROD1                     | 3     | 7               | 42.8 |
| ASCL1/NEUROD1                   | 13    | 31              | 41.9 |

| Site        |    |
|-------------|----|
| brain       | 20 |
| lung        | 16 |
| node        | 13 |
| bronchus    | 4  |
| pleura      | 3  |
| spine       | 2  |
| trachea     | 1  |
| mediastinum | 1  |
| neck        | 1  |
| diaphragm   | 1  |
| adrenal     | 1  |
| liver       | 1  |

|                      |                                                |   |          |     |     |     |     |    |    |
|----------------------|------------------------------------------------|---|----------|-----|-----|-----|-----|----|----|
|                      | 649                                            | 2 | bronchus | 0   | 225 | na  | na  | na | na |
|                      | 665                                            | 2 | brain    | 0   | 210 | 195 | 1   | 0  | 1  |
|                      | 669                                            | 2 | brain    | 0   | 285 | 294 | 75  | 0  | 0  |
|                      | 671                                            | 2 | lung     | 0   | 180 | na  | na  | na | na |
|                      | 677                                            | 2 | bronchus | 15  | 120 | 20  | 0   | 0  | 0  |
|                      | 693                                            | 2 | lung     | 0   | 255 | 35  | 10  | 0  | 0  |
|                      | 697                                            | 2 | lung     | 0   | 270 | 0   | na  | na | 0  |
|                      | 703                                            | 2 | spine    | 0   | 180 | 270 | 40  | 0  | 0  |
|                      | 662                                            | 2 | node     | 0   | 60  | 0   | 0   | 0  | 0  |
|                      | 737                                            | 2 | liver    | na  | na  | 195 | 2   | 0  | 0  |
| <b>TMA 0048</b>      | ?                                              | 4 | brain    | 0   | 180 | na  | 160 | 6  | 0  |
|                      | ?                                              | 2 | brain    | 0   | 0   | 0   | 30  | 0  | 0  |
|                      | 527                                            | 4 | brain    | 15  | 50  | 110 | 0   | 0  | 2  |
|                      | ?                                              | 2 | brain    | 0   | 0   | na  | na  | 0  | 0  |
|                      | 776                                            | 4 | brain    | 225 | 120 | 40  | 0   | 15 | 6  |
|                      | ?                                              | 4 | brain    | 0   | 70  | 40  | 285 | 0  | 0  |
|                      | ?                                              | 6 | brain    | 10  | 270 | 270 | 240 | 0  | 0  |
|                      | 603                                            | 2 | brain    | 0   | 85  | 180 | 0   | 0  | 70 |
|                      | 655                                            | 6 | brain    | 0   | 270 | 285 | 3   | 0  | 4  |
| <b>Multiple TMAs</b> | 552                                            | 2 | brain    | 5   | 190 | 180 | 0   | 0  | 0  |
|                      | 471                                            | 6 | brain    | 180 | 285 | 270 | 270 | 0  | 40 |
|                      | 554                                            | 8 | brain    | 5   | 255 | 270 | 0   | 0  | 0  |
|                      | 589                                            | 6 | brain    | 0   | 270 | 190 | 285 | 6  | 30 |
|                      | 460                                            | 4 | brain    | 0   | 240 | 180 | 180 | 0  | 0  |
|                      |                                                |   |          |     |     |     |     |    |    |
|                      | * All RB1 positives case highlighted in yellow |   |          |     |     |     |     |    |    |
|                      | na = no tissue available for analysis          |   |          |     |     |     |     |    |    |

**SUPPLEMENT TABLE 4: PATIENT CHARACTERISTICS OF IHC (N=64) COHORT (8 missing)**

|                                             | <b>RB1: Positive (N=9)</b> | <b>RB1: Negative (N=47)</b> | <b>p-value</b> |
|---------------------------------------------|----------------------------|-----------------------------|----------------|
| <b>Age: mean (STD)</b>                      | 64.8 (4.1)                 | 67.7 (9.9)                  | 0.454          |
| <b>Sex: Male/Female (0 missing)</b>         | 6/3                        | 26/21                       | 0.529          |
| <b>Race: White/Black (1 missing)</b>        | 7/2                        | 36/10                       | 0.974          |
| <b>Smoking: No/Yes (0 missing)</b>          | 2/7                        | 1/46                        | 0.014          |
| <b>Stage: Extensive/Limited (2 missing)</b> | 6/3                        | 37/8                        | 0.29           |
| <b>Stage: (6 missing)</b>                   |                            |                             |                |
| <b>1,2</b>                                  | 2                          | 3                           |                |
| <b>3</b>                                    | 1                          | 2                           | 0.285          |
| <b>4</b>                                    | 6                          | 36                          |                |

**SUPPLEMENT TABLE 5: PATIENT CHARACTERISTICS OF GENOMIC (N=122) COHORT**

|                                             | <b>RB1: WT (N=37)</b> | <b>RB1: Mutant (N=85)</b> | <b>p-value</b> |
|---------------------------------------------|-----------------------|---------------------------|----------------|
| <b>Age: mean (STD)</b>                      | 62.2 (11.4)           | 65.9 (9.4)                | 0.089          |
| <b>Sex: Male/Female (0 missing)</b>         | 21/16                 | 36/49                     | 0.143          |
| <b>Race: White/Black (8 missing)</b>        | 21/14                 | 61/18                     | 0.059          |
| <b>Smoking: No/Yes (3 missing)</b>          | 3/33                  | 5/78                      | 0.644          |
| <b>Stage: Extensive/Limited (1 missing)</b> | 30/6                  | 61/24                     | 0.178          |
| <b>Stage: (22 missing)</b>                  |                       |                           |                |
| <b>1,2</b>                                  | 0                     | 4                         |                |
| <b>3</b>                                    | 2                     | 7                         | 0.283          |
| <b>4</b>                                    | 30                    | 57                        |                |





**SUPPLEMENT TABLE 7: RB1 stained tumor cores with known *RB1* mutation status**

| <b>TMA</b>  | <b>Type SCLC</b> | <b>PID</b> | <b><i>RB1</i> Mut status</b> |                     | <b>Platform</b> | <b>Site</b> | <b>RB1 H score</b> |
|-------------|------------------|------------|------------------------------|---------------------|-----------------|-------------|--------------------|
| <b>0035</b> | pure             | 482        | mutant                       | Q384*               | FM              | lung        | 5                  |
|             |                  |            |                              |                     |                 |             |                    |
| <b>0047</b> | pure             | 636        | mutant                       | RB1-USP24 fusion    | FM              | pleura      | 100                |
|             | cSCLC            | 508        | mutant                       | RB1 loss exons 9-11 | FM              | diaphragm   | 3                  |
|             | pure             | 639        | mutant                       | R467*               | FM              | node        | 0                  |
|             | pure             | 649        | wt                           |                     | FM              | bronchus    | 0                  |
|             | pure             | 677        | wt                           |                     | FM              | bronchus    | 15                 |
|             | pure             | 693        | mutant                       | G617fs*6            | FM              | lung        | 0                  |
|             |                  |            |                              |                     |                 |             |                    |
| <b>0048</b> | cSCLC            | 776        | wt                           |                     | FM              | brain       | 225                |

| SUPPLEMENT TABLE 8    |             |                                           |        |             |                                        |        |      |                                   |                          |             |                       |
|-----------------------|-------------|-------------------------------------------|--------|-------------|----------------------------------------|--------|------|-----------------------------------|--------------------------|-------------|-----------------------|
| Patient 2: RESPONDER  |             |                                           |        |             |                                        |        |      |                                   |                          |             |                       |
| Sample                | Pre-Rx      |                                           |        |             | Post-Rx                                |        |      |                                   | Patient 1: NON-RESPONDER |             |                       |
| Platform              | TEMPUS xT   |                                           |        |             | TEMPUS xT                              |        |      |                                   | FOUNDATTIONONE*CDx       |             |                       |
| Site                  | Lymph node  |                                           |        |             | Blood                                  |        |      |                                   | Lung                     |             |                       |
| Biologically Relevant | TP53        | p.T125T Splice variant- LOF               | 90.30% | TP53        | p.T125T Splice region variant-LOF      | 62.10% | TP53 | p.T124T Splice region variant-LOF | 0.40%                    | TP53        | C124R                 |
|                       | KEAP1       | p.E493V Missense- LOF                     | 80.50% |             |                                        |        |      |                                   |                          | CREBBP      | M783fs*21 - subclonal |
|                       |             |                                           |        |             |                                        |        |      |                                   |                          | BCL2        | Amp                   |
|                       |             |                                           |        |             |                                        |        |      |                                   |                          | GATA6       | Amp                   |
|                       |             |                                           |        |             |                                        |        |      |                                   |                          | SOX2        | Amp- equivocal        |
| VUS                   | AXIN1       | c.1115C>T p.P372L Splice region variant   | 87.80% | JAK2        | c.3158A>G p.K1053R Missense            | 68.40% | ALK  | c.3421G>A p. D1141N Missense      | 48.60%                   | AKT1        | Amp                   |
|                       | SYNE1       | c.1921C>T p.A6406V Missense               | 81.30% | ALK         | c.3421G>A p.D1141N Missense            | 49.30% | JAK2 | c.3158A>G p.K1053R Missense       | 47.30%                   | APC         | V2781M                |
|                       | HSPH1       | c.211del p.R71fs Frameshift               | 79.60% | KMT2A (MLL) | c.212G>T p.G71V Missense               | 35.30% |      |                                   |                          | ATM         | G3029D                |
|                       | GNAQ        | c.606-3C>T Splice region variant          | 72.90% | EGFR        | c.478G>C p.E160Q Missense              | 32.00% |      |                                   |                          | CSF3R       | T486M                 |
|                       | ZNF217      | c.1260T>A p.C420* Stop gain               | 54.70% | PTPN11      | c.1448-4G>A Splice region variant      | 31.80% |      |                                   |                          | ESR1        | R269C                 |
|                       | KMT2A (MLL) | c.212G>T p.G71V Missense                  | 53.30% | KMT2A (MLL) | c.8041G>C p.D2681H Missense            | 19.50% |      |                                   |                          | FLT1        | K673E                 |
|                       | PTPN11      | c.1448-4G>A Splice region variant         | 51.00% | PDGFRB      | c.2919_2920delinsTT p.VD973VY Missense | 0.40%  |      |                                   |                          | GABRA6      | P49S                  |
|                       | EGFR        | c.474_478delinsTGTGC p.NVE158NVQ Missense | 47.90% |             |                                        |        |      |                                   |                          | KMT2A (MLL) | P1987T                |
|                       | AP2M1       | c.1012C>T p.P338S Missense                | 35.80% |             |                                        |        |      |                                   |                          | MLL2        | K287E, V5400C         |
|                       | TOP2A       | c.2645G>C p.G882A Missense                | 28.30% |             |                                        |        |      |                                   |                          | MYCN        | A220S, I350T          |
|                       | KMT2A (MLL) | c.8041G>C p.D2681H Missense               | 23.50% |             |                                        |        |      |                                   |                          | NOTCH3      | F1358V                |
|                       |             |                                           |        |             |                                        |        |      |                                   |                          | RB1         | V84_L88del            |
|                       |             |                                           |        |             |                                        |        |      |                                   | ROS1                     | W2145C      |                       |
|                       |             |                                           |        |             |                                        |        |      |                                   | SMAD2                    | Amp         |                       |
|                       |             |                                           |        |             |                                        |        |      |                                   | SMAD4                    | Amp         |                       |
